# Supplementary material for: Multiplexed molecular profiling of lung cancer with malignant pleural effusion using next generation sequencing in Chinese patients
Source: PubMed Central journal article supplement — Oncol Lett. 2020 Mar 5;19(5):3495–505. doi: 10.3892/ol.2020.11446 (PMC7115151; doi:10.3892/ol.2020.11446), 2020-03-05

Figure S1. Hemotoxylin and eosin staining of malignant pleural effusion. A total of 6 representative MPE samples are shown compared with a control. Patient 18050707 MPE displayed numerous cancer cells exhibiting striate chromatin, uneven or irregular nucleoli, abundant cytoplasm, uneven staining, and vesicle-like and well-defined malignant cells. Patient 18051504 MPE displayed clusters of abnormal cells with abnormal nuclei, abundant cytoplasm and uneven staining. Patient 18051602 MPE displayed scattered abnormal cells in mass, with uneven cytoplasm staining and a cloudy cytoplasm, and morphologically malignant clear cells. Patient 18052526 MPE displayed abnormal cells of different sizes, clusters of cells, abnormal nuclei, different shades of cytoplasm and cells with a notably malignant appearance. Patient 18052605 MPE displayed abnormal cells differing in size, including clumpy and scattered cells, large abnormal nuclei, rich cytoplasm, and the morphology of malignant cells was clear. Patient 18062543 MPE displayed clusters of abnormal cells differing in size, with heterogeneous nuclei, uneven cytoplasm coloring and a notably malignant appearance.

#### H&E staining of malignant pleural effusion

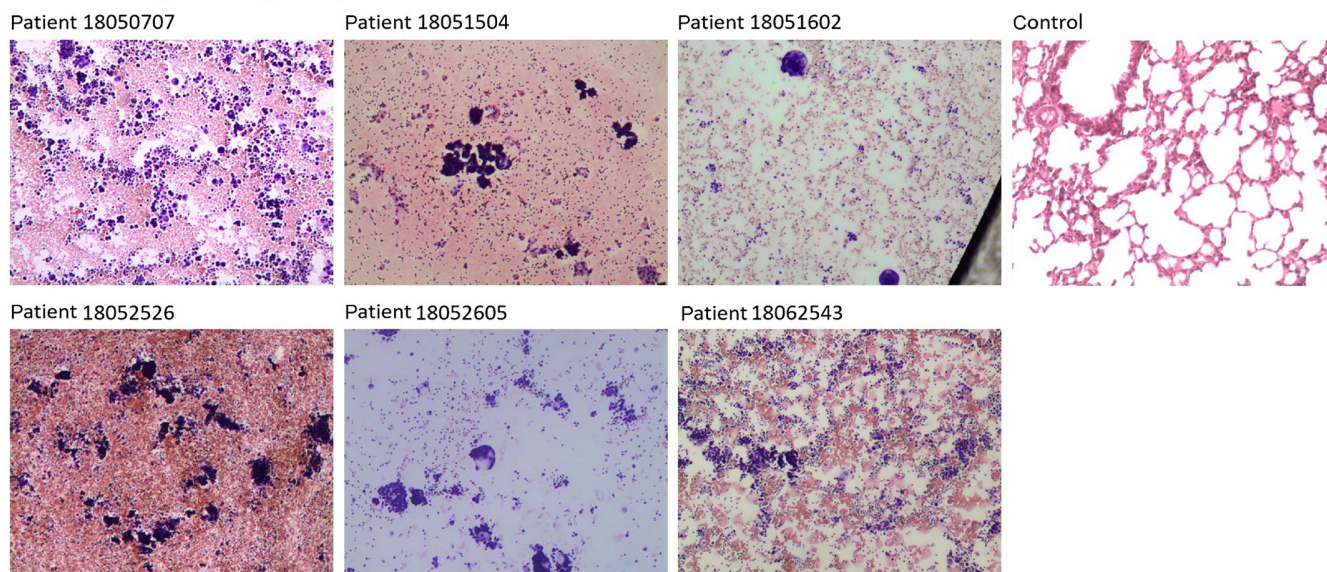

Figure S2. Amplification refractory mutation system PCR result of a gene fusion of ALK + EML4 based on the RNA level from patient 18040535. The Ct values were 9.98 and 16.89.

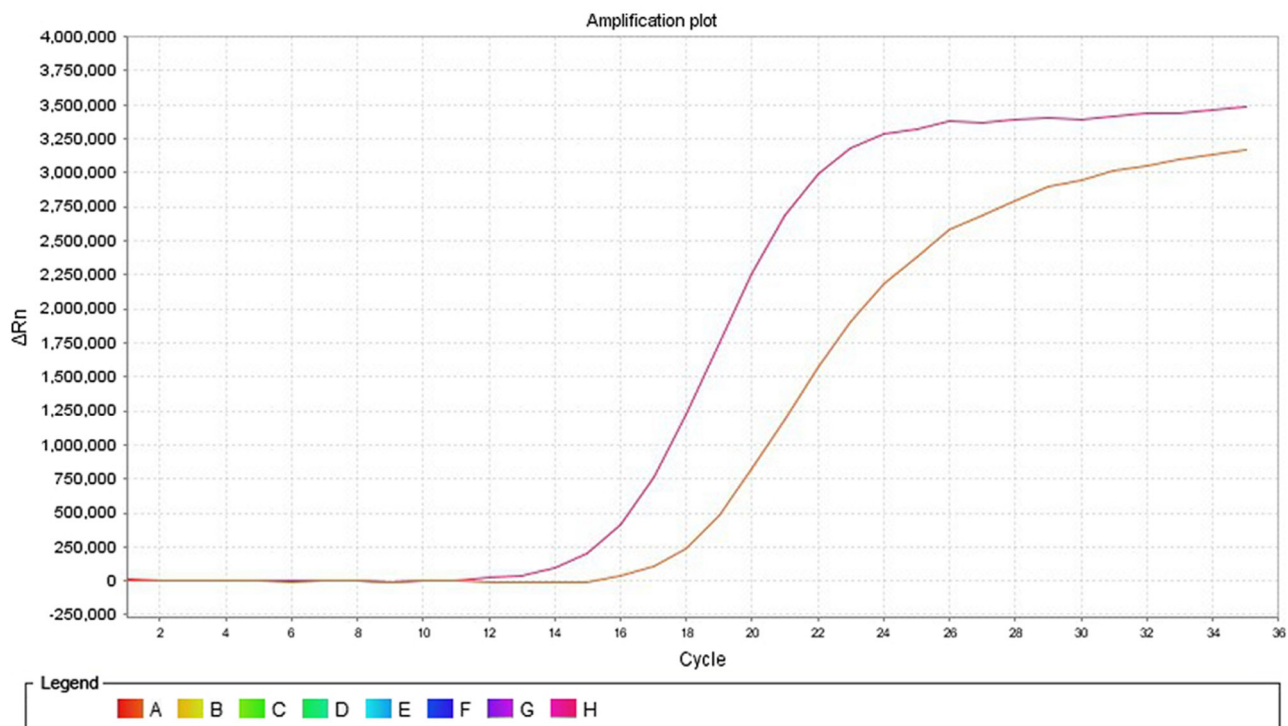

Figure S3. Amplification refractory mutation system PCR result of a BRAF N581I mutation from patient 18042126. The Ct values were 11.86 and 17.36.

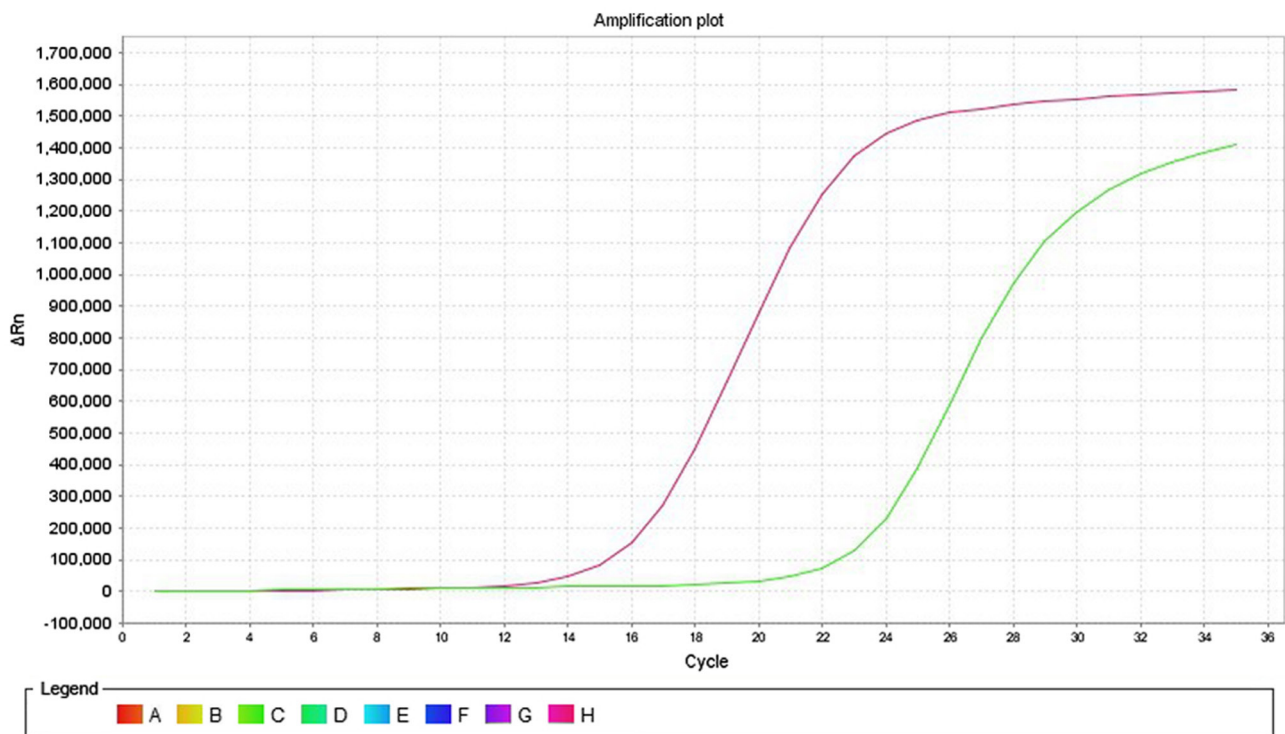

Figure S4. Amplification refractory mutation system PCR result of an EGFR exon 19 deletion mutation from patient 18062314. The Ct values were 13.66 and 16.46.

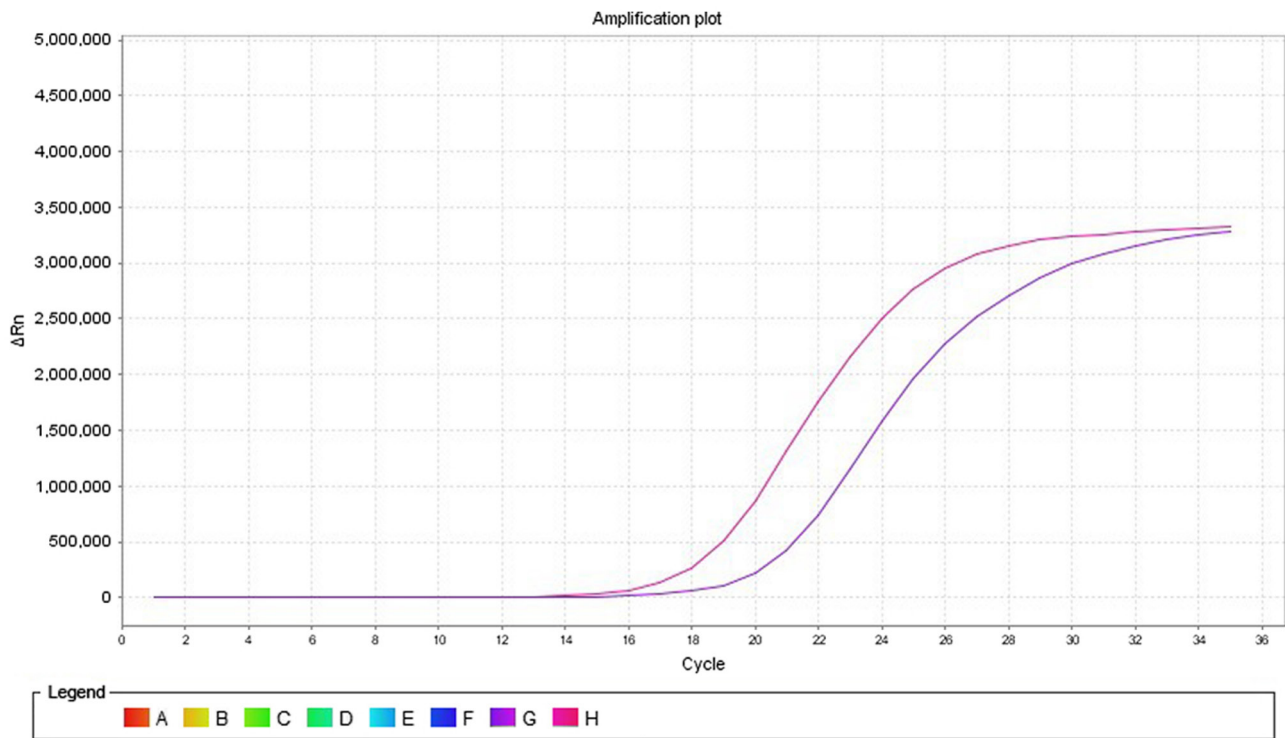

Figure S5. Amplification refractory mutation system PCR result of an EGFR exon 20 insertion mutation from patient 18011709. The Ct values were 11.66 and 20.12.

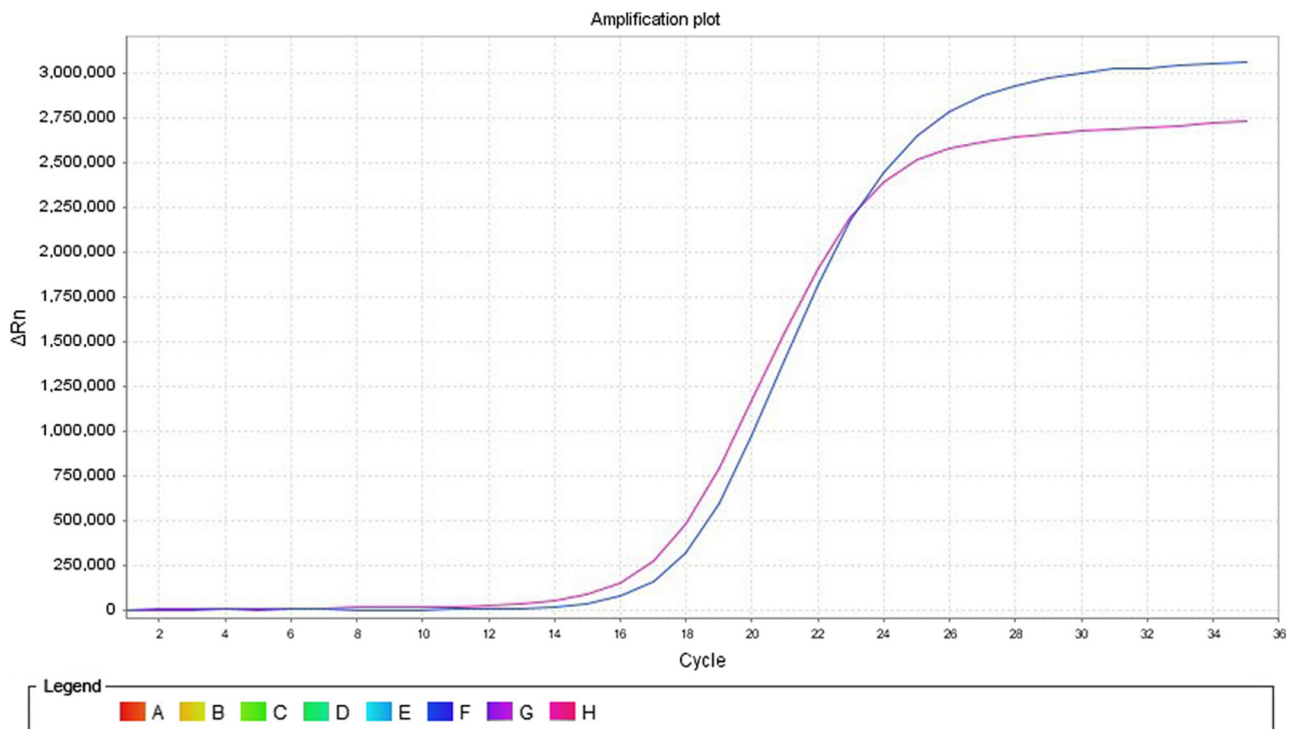

Figure S6. Amplification refractory mutation system PCR result of an EGFR G719A mutation from patient 18012202. The Ct values were 14.71 and 17.02.

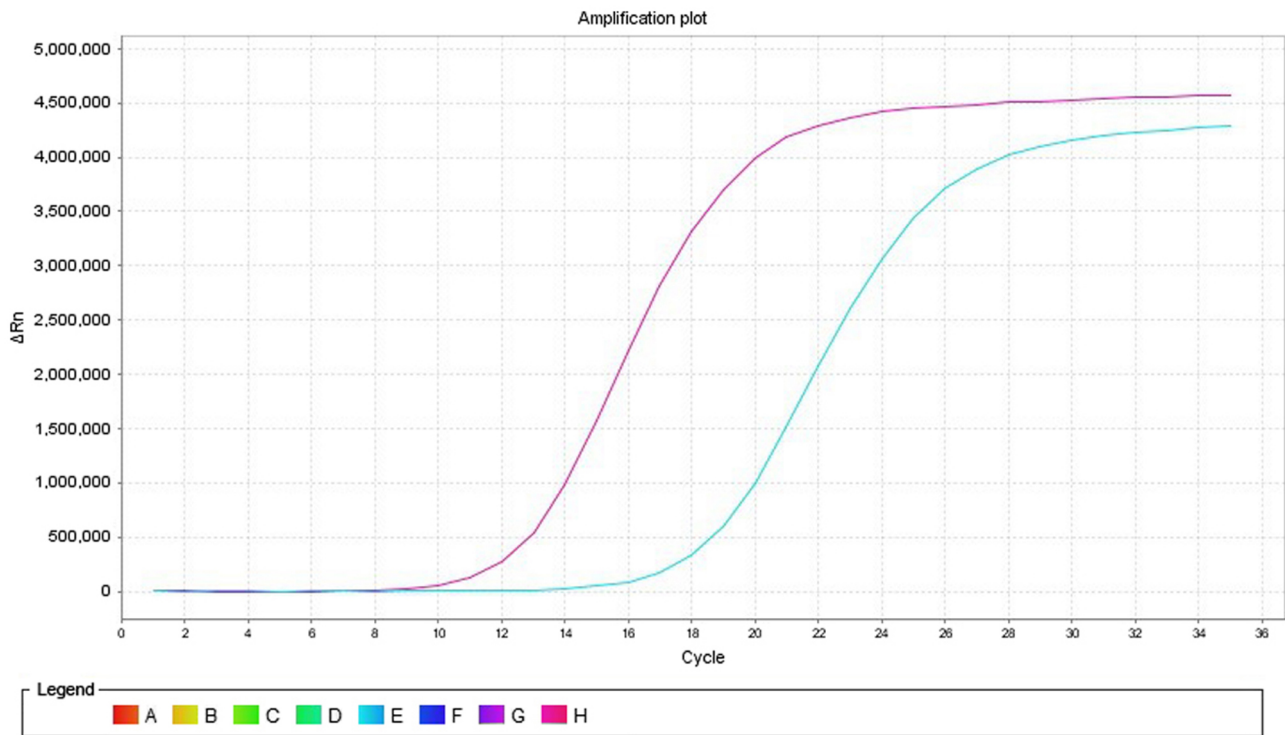



Figure S7. Amplification refractory mutation system PCR result of a KRAS G12S mutation from patient 18060717. The Ct values were 11.85 and 18.26.

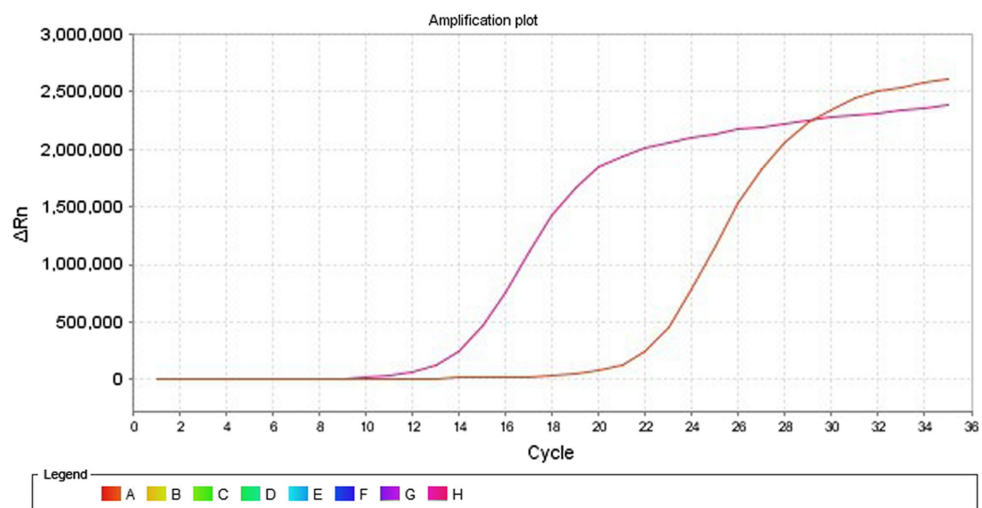

Figure S8. Amplification refractory mutation system PCR result of an EGFR L858R mutation from patient 18050707. The Ct values were 12.96 and 13.56.

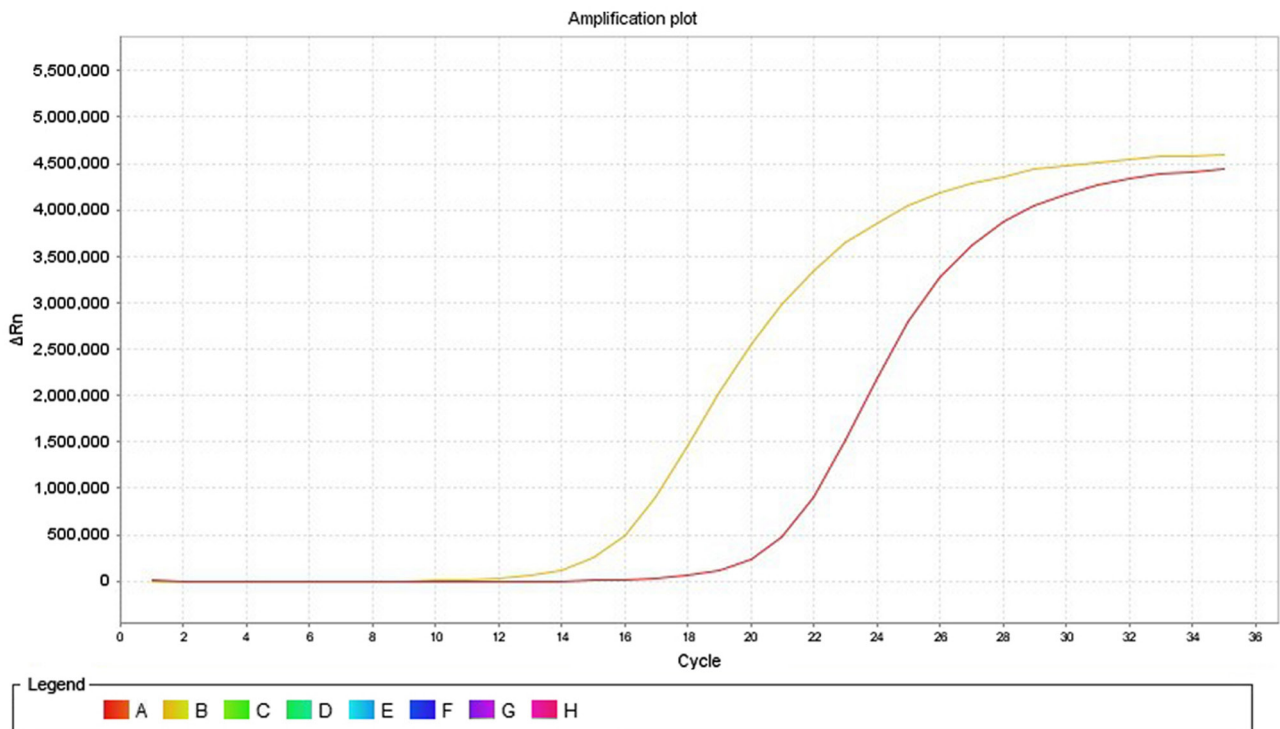



Figure S9. Amplification refractory mutation system PCR result of an EGFR L861Q mutation from patient 18011513. The Ct values were 12.22 and 15.64.

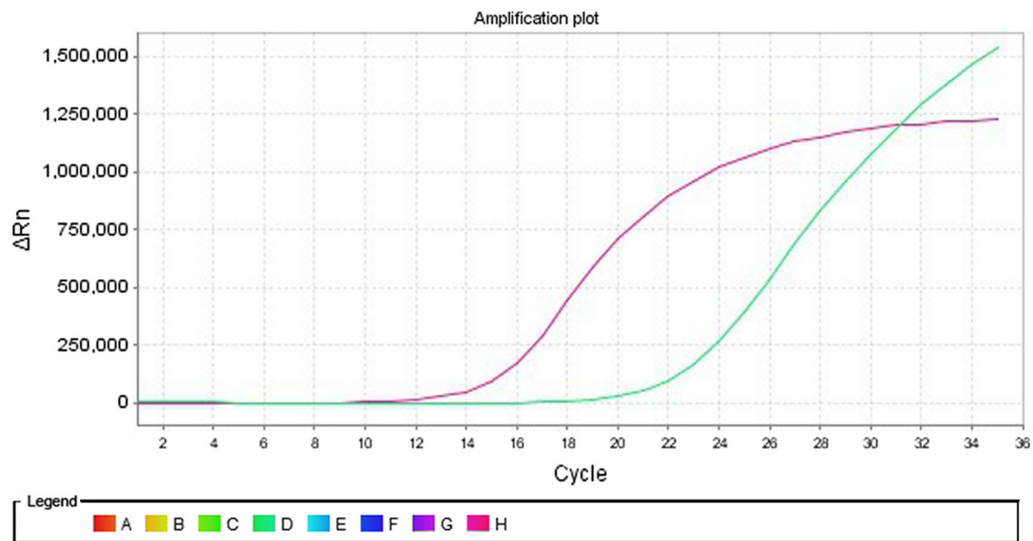

Figure S10. Amplification refractory mutation system PCR result of an EGFR T790M mutation from patient 18051017. The Ct values were 9.36 and 14.01.

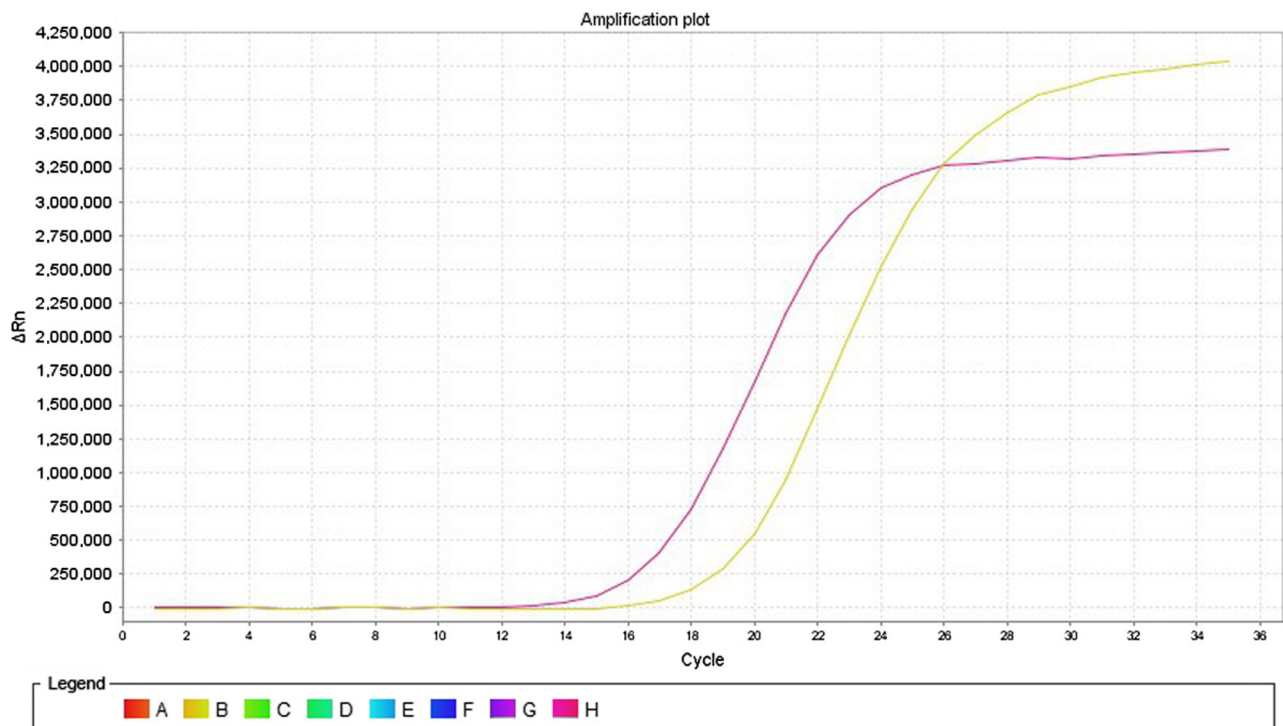

Supplement: Supplementary_Data3.pdf [file Supplementary_Data3.pdf]
